# Supplementary material
Source: HighWire-hosted journal article supplement (http://www.cmaj.ca/highwire/filestream/57664/field_highwire_adjunct_files/3/predict-van-4-at.pdf)

**Appendix 4 (as submitted by the authors):** All cause survival of validation cohort stratified by index score. This plot presents the proportion of patients alive (vertical axis) at years after being placed on the transplant list (horizontal axis). The index scores within each group are presented in the legend. Each Kaplan–Meier curve is significantly different from all others at  $p < 0.01$  by the Log-Rank Test.

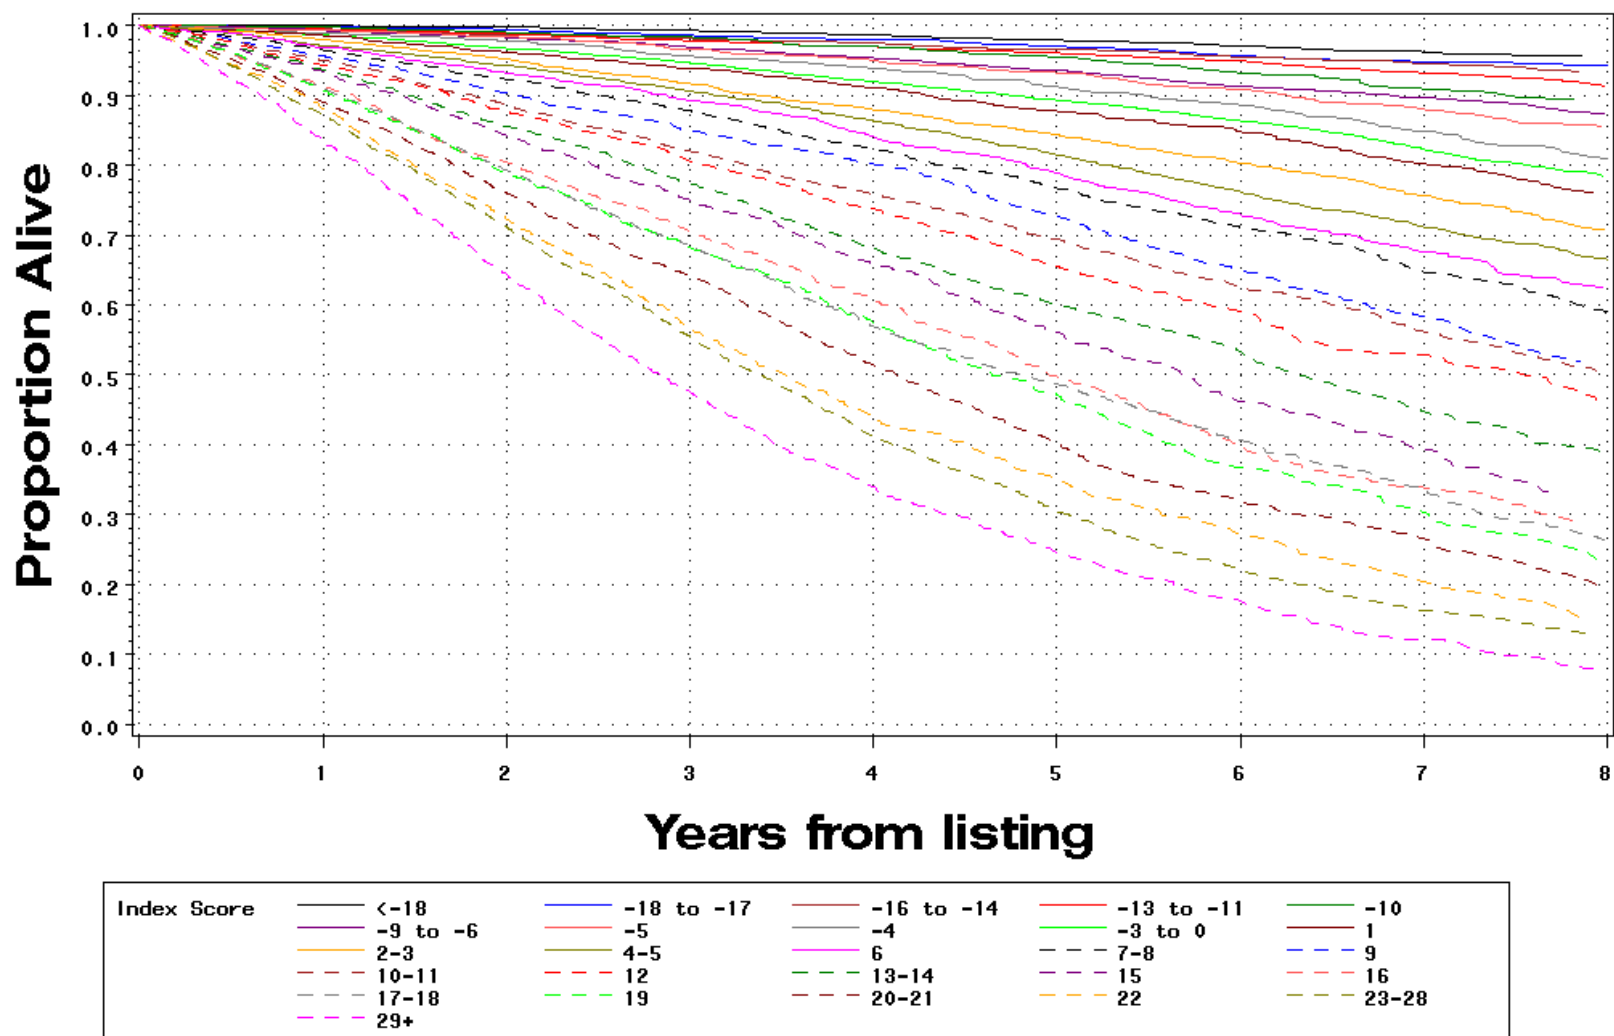

Supplement: predict-van-4-at.pdf [file predict-van-4-at.pdf]
